# Supplementary material for: Development of New Antimicrobial Oleanonic Acid Polyamine Conjugates
Source: MDPI journal article supplement (doi:10.3390/antibiotics11010094), 2022-01-12
Supplement: s1 [file s1]

## SUPPORTING INFORMATION

# Development of new antimicrobial oleanonic acid polyamine conjugates

Elmira F. Khusnutdinova<sup>1,2\*</sup>, Véronique Sinou<sup>2</sup>, Denis A. Babkov<sup>3</sup>, Oxana Kazakova<sup>1</sup> and Jean Michel Brunel<sup>2\*</sup>

<sup>1</sup> Ufa Institute of Chemistry UFRC RAS, 71, pr. Oktyabrya, 450054 Ufa, Russian Federation.

<sup>2</sup> Aix Marseille Univ, INSERM, SSA, MCT, 13385 Marseille, France.

<sup>3</sup> Scientific Center for Innovative Drugs, Volgograd State Medical University, Novorossiyskaya st. 39, 400087 Volgograd, Russian Federation.

\* Correspondence: EFK [ElmaH@inbox.ru](mailto:ElmaH@inbox.ru), JMB [bruneljm@yahoo.fr](mailto:bruneljm@yahoo.fr)

| Cp<br>d | SMILES                                                                                                                              |
|---------|-------------------------------------------------------------------------------------------------------------------------------------|
| 2a      | <chem>CC1(C)CC[C@]2(C(NCCN)=O)CC[C@@]3(C)[C@]4(C)CC[C@]5([H])C(C)(C)C(CC[C@]5(C)[C@@]4([H])CC=C3[C@]2([H])C1)=O</chem>              |
| 2b      | <chem>CC1(C)CC[C@]2(C(NCCCN)=O)CC[C@@]3(C)[C@]4(C)CC[C@]5([H])C(C)(C)C(CC[C@]5(C)[C@@]4([H])CC=C3[C@]2([H])C1)=O</chem>             |
| 2c      | <chem>CC1(C)CC[C@]2(C(NCCCCCN)=O)CC[C@@]3(C)[C@]4(C)CC[C@]5([H])C(C)(C)C(CC[C@]5(C)[C@@]4([H])CC=C3[C@]2([H])C1)=O</chem>           |
| 2d      | <chem>CC1(C)CC[C@]2(C(NCCCN3CCCC3=O)=O)CC[C@@]4(C)[C@]5(C)CC[C@]6([H])C(C)(C)C(CC[C@]6(C)[C@@]5([H])CC=C4[C@]2([H])C1)=O</chem>     |
| 2e      | <chem>CC1(C)CC[C@]2(C(NCCCN3CCOCC3=O)CC[C@@]4(C)[C@]5(C)CC[C@]6([H])C(C)(C)C(CC[C@]6(C)[C@@]5([H])CC=C4[C@]2([H])C1)=O</chem>       |
| 2f      | <chem>CC1(C)CC[C@]2(C(NCCCN3CCN(CCCN)CC3=O)CC[C@@]4(C)[C@]5(C)CC[C@]6([H])C(C)(C)C(CC[C@]6(C)[C@@]5([H])CC=C4[C@]2([H])C1)=O</chem> |
| 2g      | <chem>CC1(C)CC[C@]2(C(NCCNCCN)=O)CC[C@@]3(C)[C@]4(C)CC[C@]5([H])C(C)(C)C(CC[C@]5(C)[C@@]4([H])CC=C3[C@]2([H])C1)=O</chem>           |
| 2h      | <chem>CC1(C)CC[C@]2(C(NCCCNCCCN)=O)CC[C@@]3(C)[C@]4(C)CC[C@]5([H])C(C)(C)C(CC[C@]5(C)[C@@]4([H])CC=C3[C@]2([H])C1)=O</chem>         |
| 2i      | <chem>CC1(C)CC[C@]2(C(NCCCN(C)CCN)=O)CC[C@@]3(C)[C@]4(C)CC[C@]5([H])C(C)(C)C(CC[C@]5(C)[C@@]4([H])CC=C3[C@]2([H])C1)=O</chem>       |
| 2j      | <chem>CC1(C)CC[C@]2(C(NCCNCCNCCNCCN)=O)CC[C@@]3(C)[C@]4(C)CC[C@]5([H])C(C)(C)C(CC[C@]5(C)[C@@]4([H])CC=C3[C@]2([H])C1)=O</chem>     |
| 2k      | <chem>CC1(C)CC[C@]2(C(NCCNCCNCCNCCNCCN)=O)CC[C@@]3(C)[C@]4(C)CC[C@]5([H])C(C)(C)C(CC[C@]5(C)[C@@]4([H])CC=C3[C@]2([H])C1)=O</chem>  |
| 2l      | <chem>CC1(C)CC[C@]2(C(NCCCNCCCCNCCCN)=O)CC[C@@]3(C)[C@]4(C)CC[C@]5([H])C(C)(C)C(CC[C@]5(C)[C@@]4([H])CC=C3[C@]2([H])C1)=O</chem>    |

|    |                                                                                                                                               |
|----|-----------------------------------------------------------------------------------------------------------------------------------------------|
| 2m | <chem>CC1(C)CC[C@@]2(C(NCCCCCCCCOCCCN)=O)CC[C@@]3(C)[C@@]4(C)CC[C@@]5([H])C(C)(C)C(CC[C@@]5(C)[C@@]4([H])CC=C3[C@@]2([H])C1)=O</chem>         |
| 2n | <chem>CC1(C)CC[C@@]2(C(NCCCN(CCCN)CCCN)=O)CC[C@@]3(C)[C@@]4(C)CC[C@@]5([H])C(C)(C)C(CC[C@@]5(C)[C@@]4([H])CC=C3[C@@]2([H])C1)=O</chem>        |
| 3  | <chem>CC1(C)C(NCCCNCCCCNCCCN)CC[C@@]2(C)[C@@]1([H])CC[C@@]3(C)[C@@]2([H])CC=C4[C@@]3(C)CC[C@@]5(C(OC)=O)[C@@]4([H])CC(C)(C)CC5</chem>         |
| 4  | <chem>CC1(C)C(NCCCN(CC2)CCN2CCCN)CC[C@@]3(C)[C@@]1([H])CC[C@@]4(C)[C@@]3([H])CC=C5[C@@]4(C)CC[C@@]6(C(OC)=O)[C@@]5([H])CC(C)(C)CC6</chem>     |
| 5  | <chem>CC1(C)C(CC[C@@]2(C)[C@@]1([H])CC[C@@]3(C)[C@@]2([H])CC=C4[C@@]3(C)CC[C@@]5(C(NCC#C)=O)[C@@]4([H])CC(C)(C)CC5)=O</chem>                  |
| 6  | <chem>CC1(C)C(CC[C@@]2(C)[C@@]1([H])CC[C@@]3(C)[C@@]2([H])CC=C4[C@@]3(C)CC[C@@]5(C(NCC#CCN(CCCN)CCCN)CCCN)=O)[C@@]4([H])CC(C)(C)CC5)=O</chem> |
| 7a | <chem>CC1(C)[C@@H](O)CC[C@@]2(C)[C@@]1([H])CC[C@@]3(C)[C@@]2([H])CC=C4[C@@]3(C)CC[C@@]5(C(NCCCNCCCN)=O)[C@@]4([H])CC(C)(C)CC5</chem>          |
| 7b | <chem>CC1(C)[C@@H](O)CC[C@@]2(C)[C@@]1([H])CC[C@@]3(C)[C@@]2([H])CC=C4[C@@]3(C)CC[C@@]5(C(NCCCN(C)CCCN)=O)[C@@]4([H])CC(C)(C)CC5</chem>       |
| 7c | <chem>CC1(C)[C@@H](O)CC[C@@]2(C)[C@@]1([H])CC[C@@]3(C)[C@@]2([H])CC=C4[C@@]3(C)CC[C@@]5(C(NCCNCCNCCNCCN)=O)[C@@]4([H])CC(C)(C)CC5</chem>      |

**Table S1:** SMILES Code of the synthesized compounds

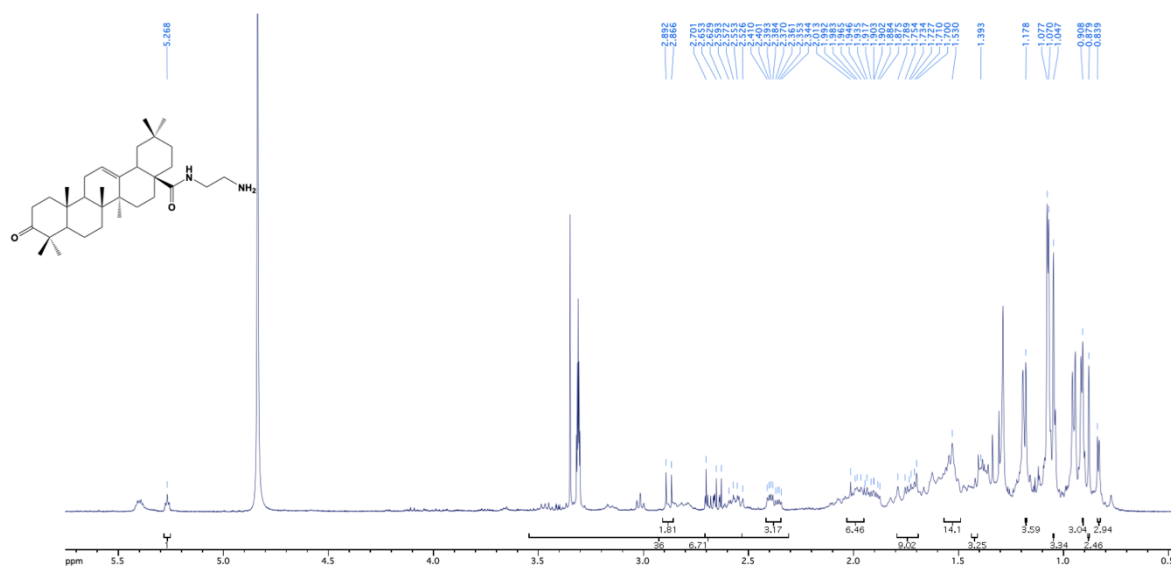

Figure S1.  $^1\text{H}$  NMR spectrum of compound **2a**

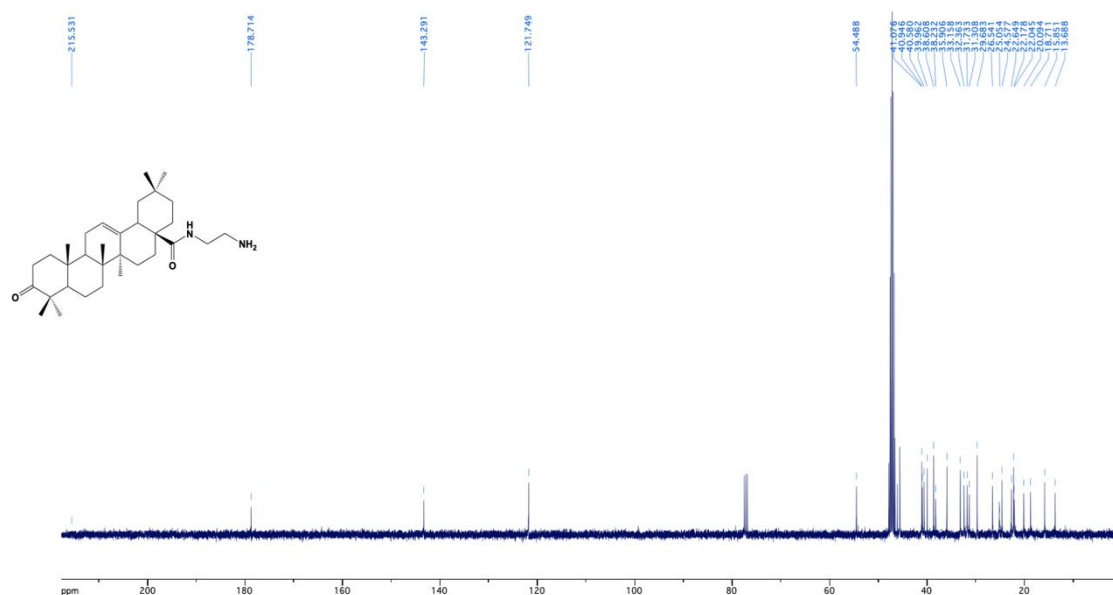

Figure S2.  $^{13}\text{C}$  NMR spectrum of compound **2a**

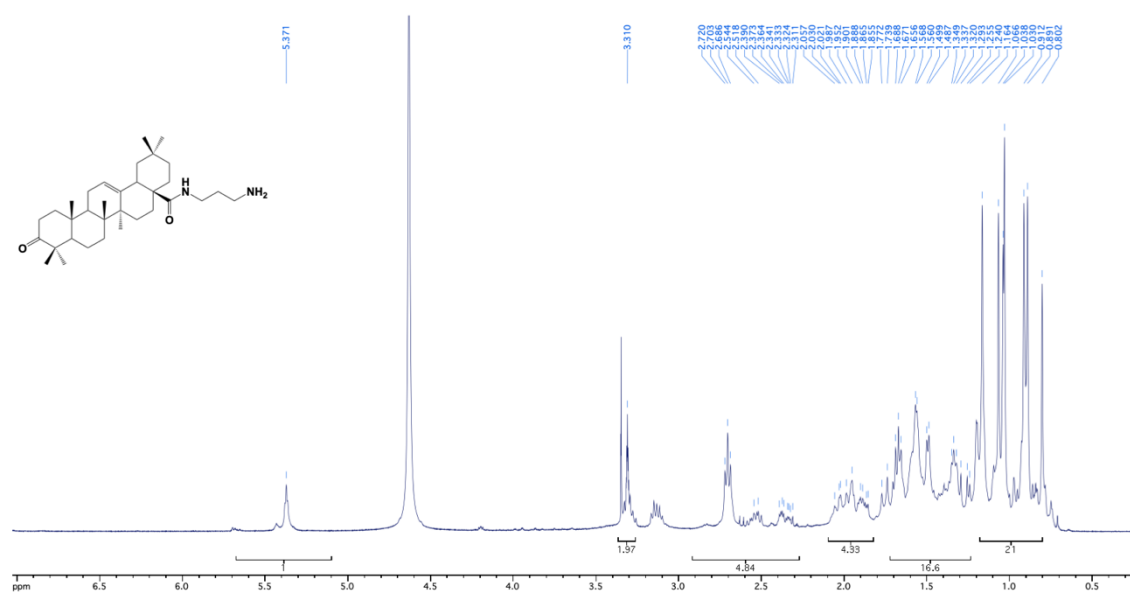

Figure S3.  $^1\text{H}$  NMR spectrum of compound **2b**

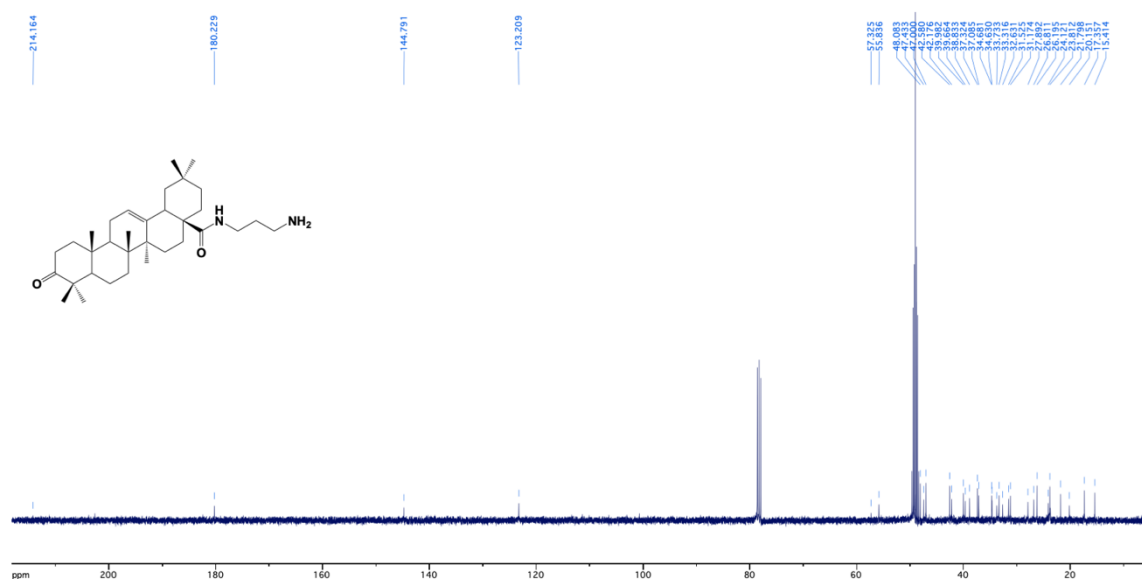

Figure S4.  $^{13}\text{C}$  NMR spectrum of compound **2b**

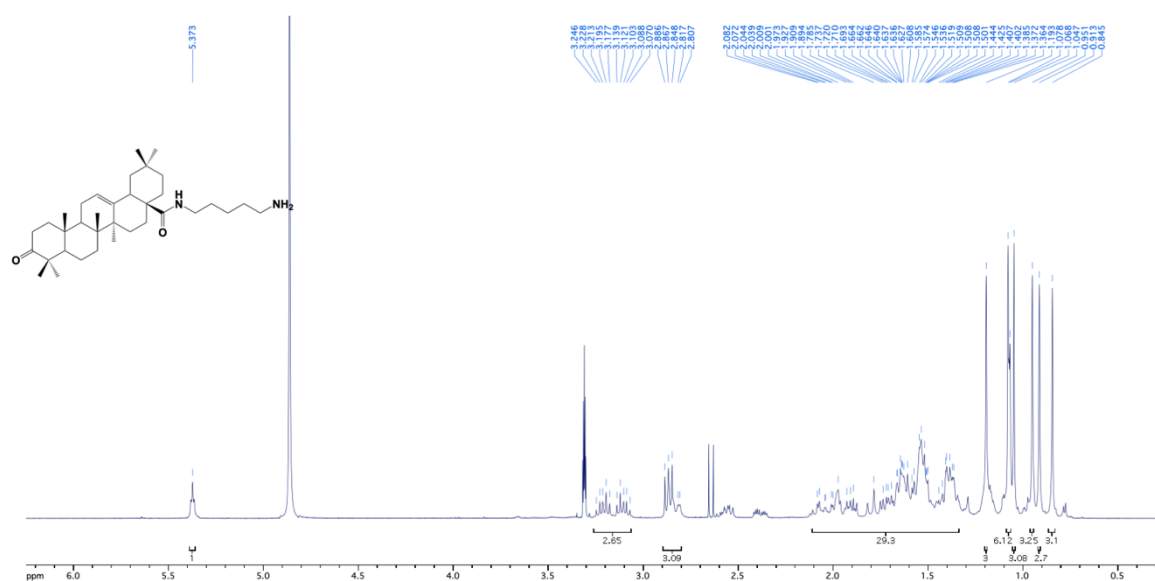

Figure S5.  $^1\text{H}$  NMR spectrum of compound **2c**

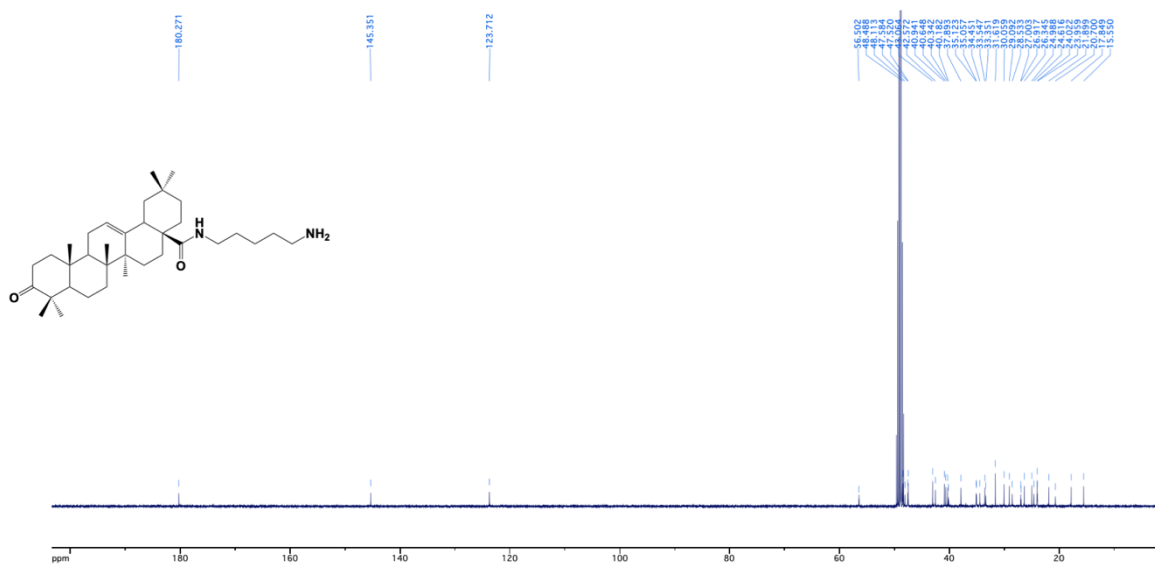

Figure S6.  $^{13}\text{C}$  NMR spectrum of compound **2c**

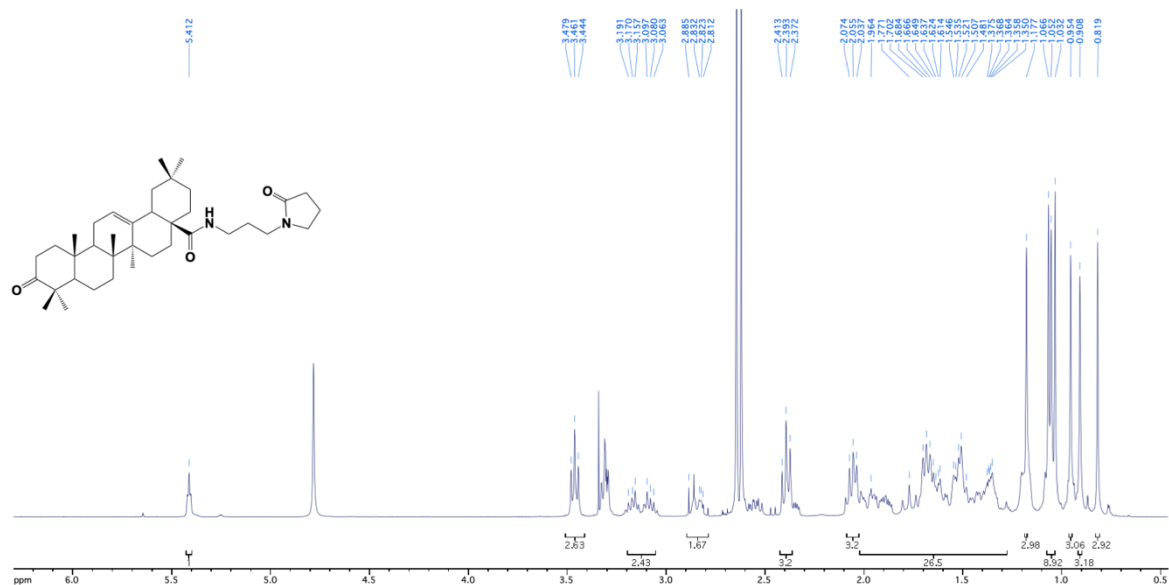

Figure S7.  $^1\text{H}$  NMR spectrum of compound **2d**

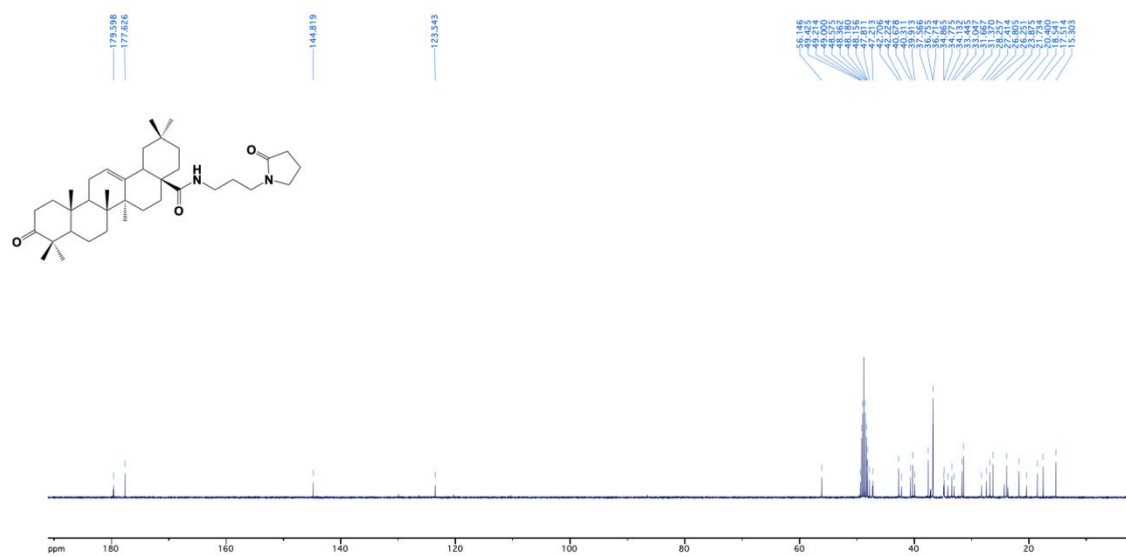

Figure S8.  $^{13}\text{C}$  NMR spectrum of compound **2d**



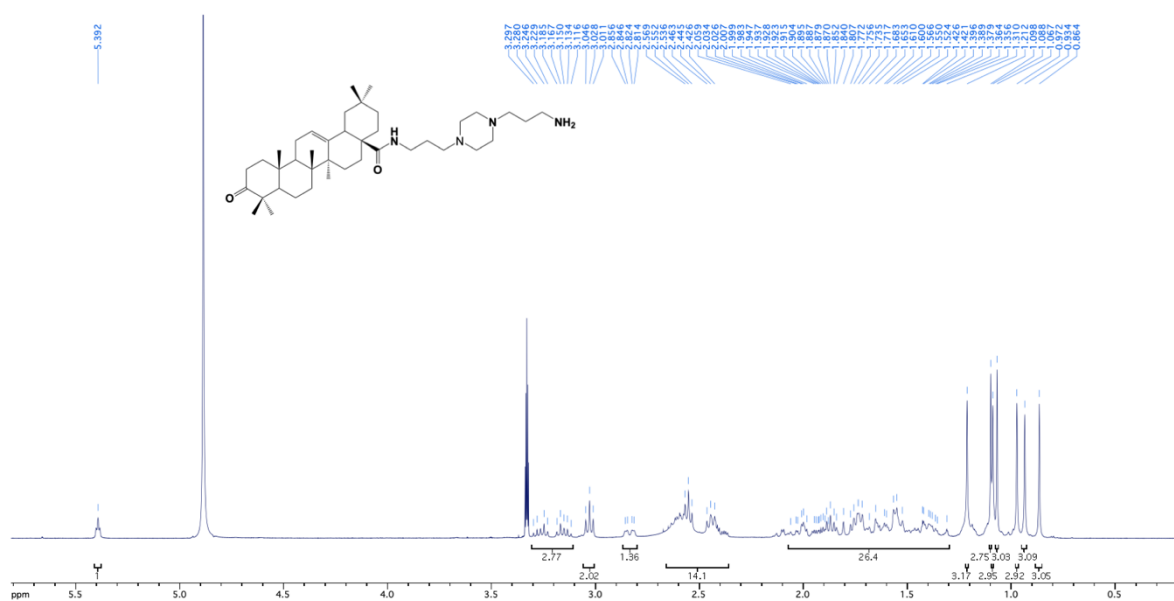

Figure S11.  $^1\text{H}$  NMR spectrum of compound **2f**

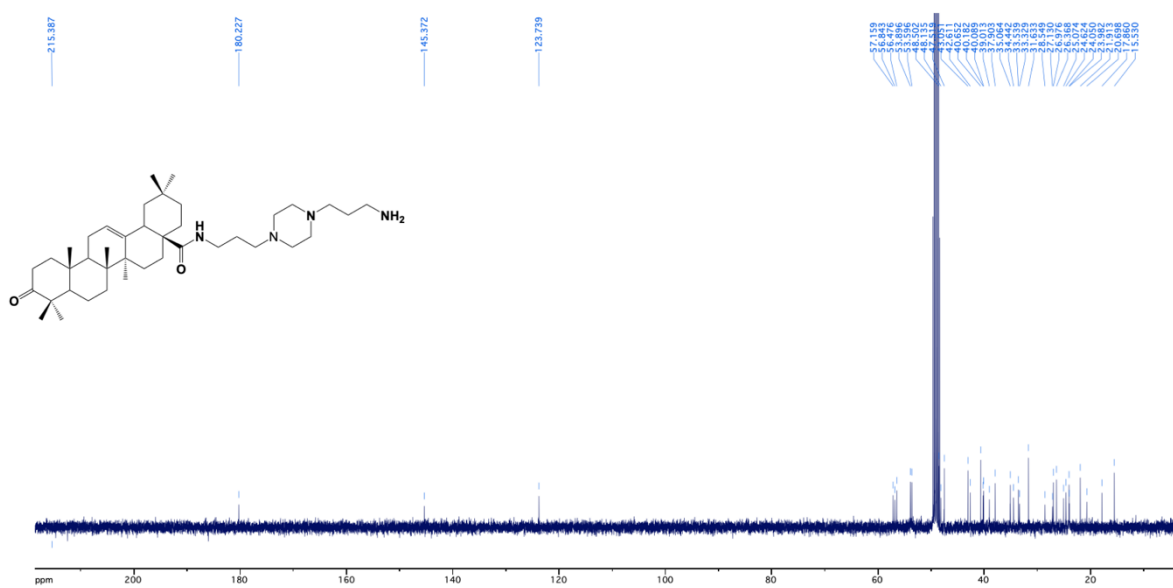

Figure S12.  $^{13}\text{C}$  NMR spectrum of compound **2f**



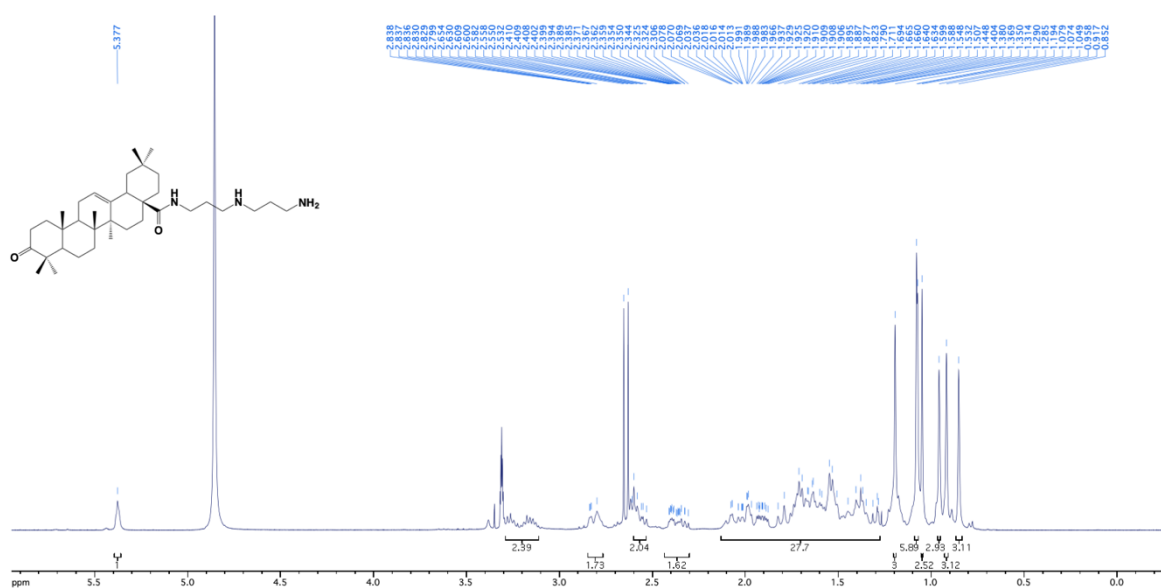

Figure S13.  $^1\text{H}$  NMR spectrum of compound **2h**

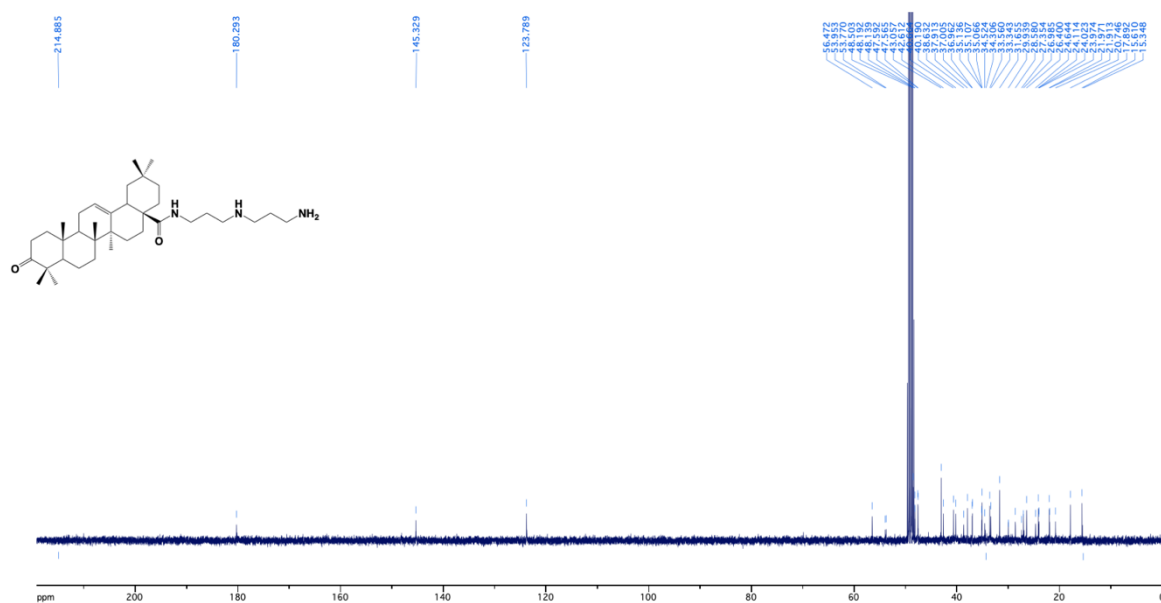

Figure S14.  $^{13}\text{C}$  NMR spectrum of compound **2h**

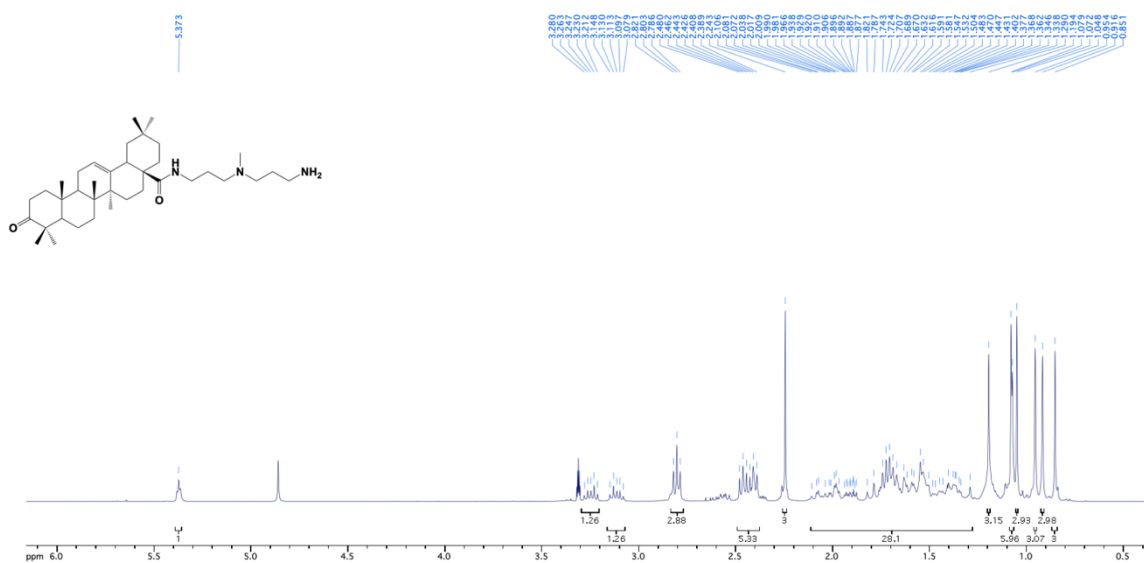

Figure S15.  $^1\text{H}$  NMR spectrum of compound **2i**

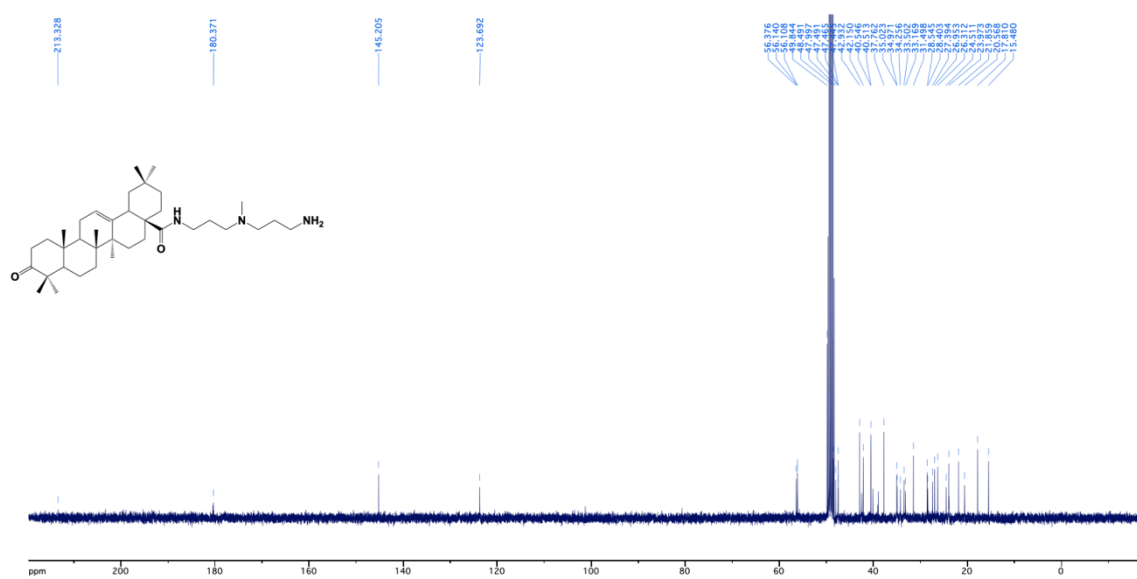

Figure S16.  $^{13}\text{C}$  NMR spectrum of compound **2i**

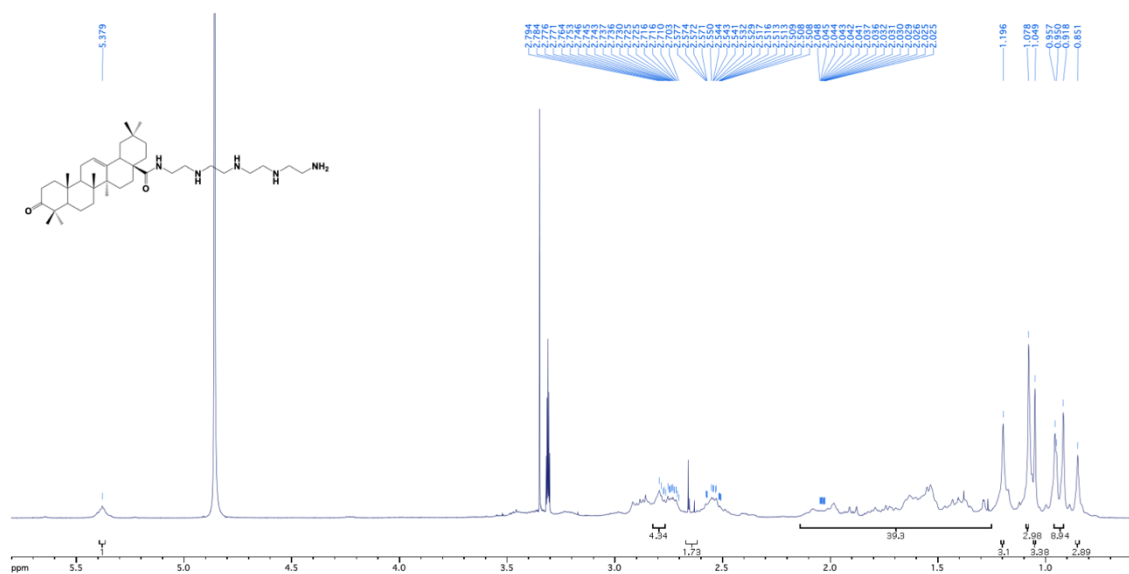

Figure S17.  $^1\text{H}$  NMR spectrum of compound **2j**

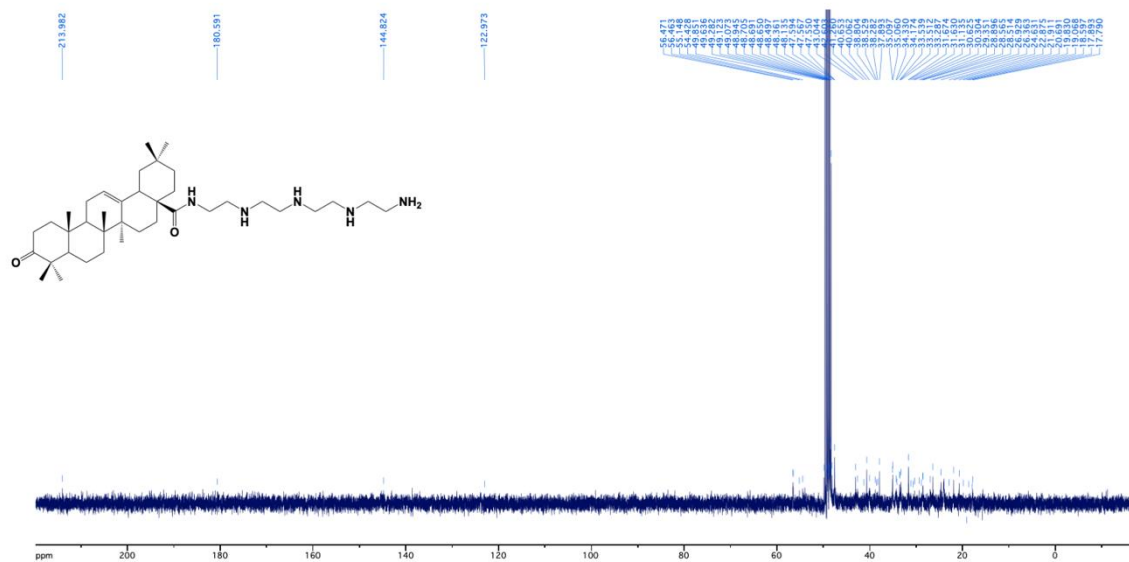

Figure S18.  $^{13}\text{C}$  NMR spectrum of compound **2j**

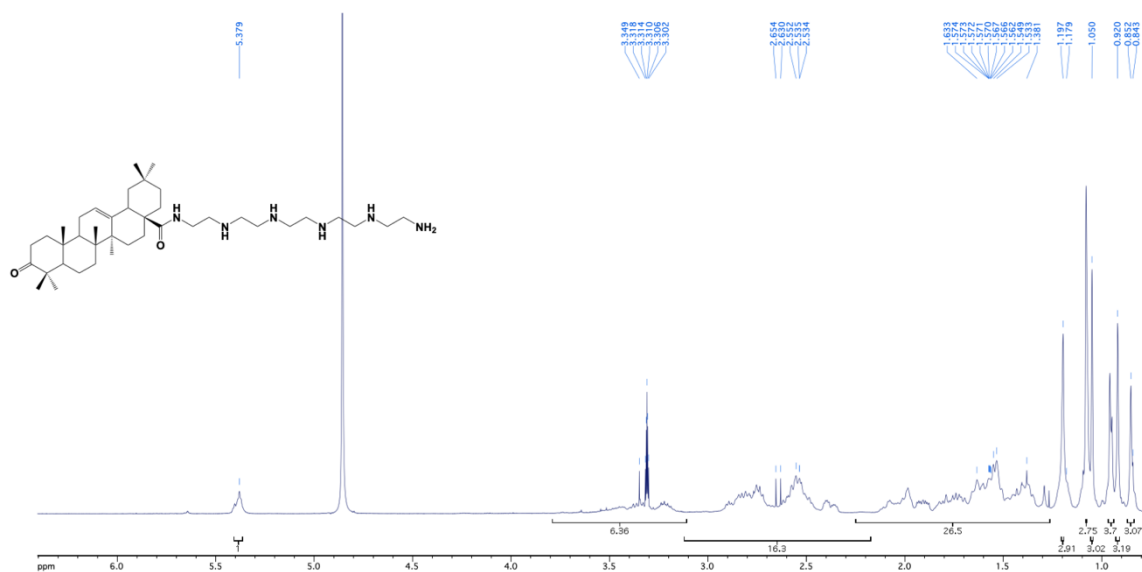

Figure S19.  $^1\text{H}$  NMR spectrum of compound **2k**

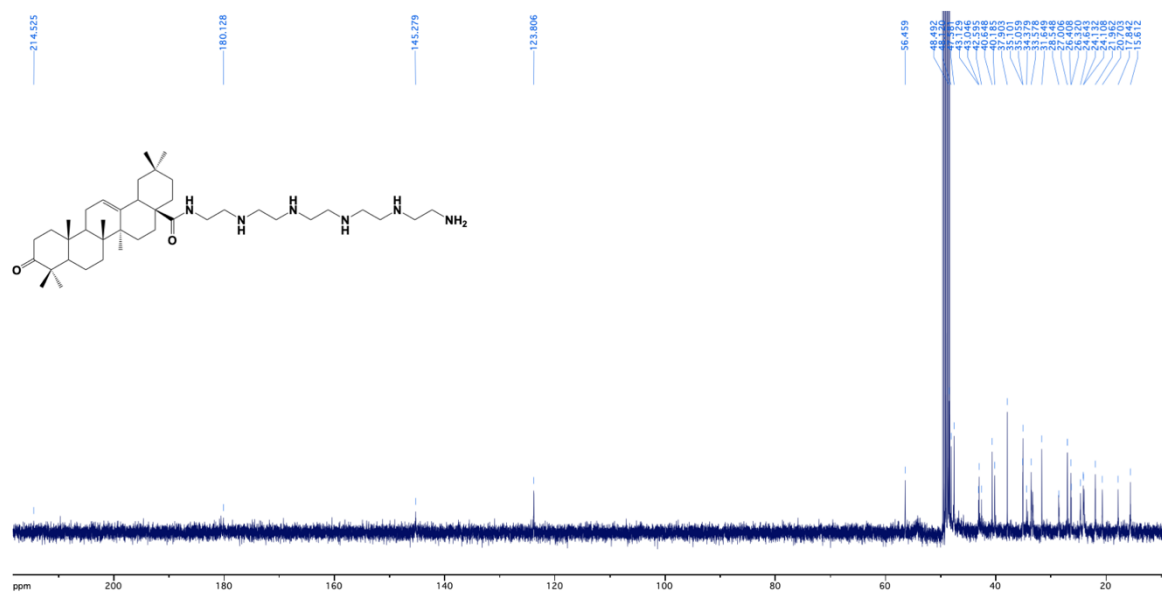

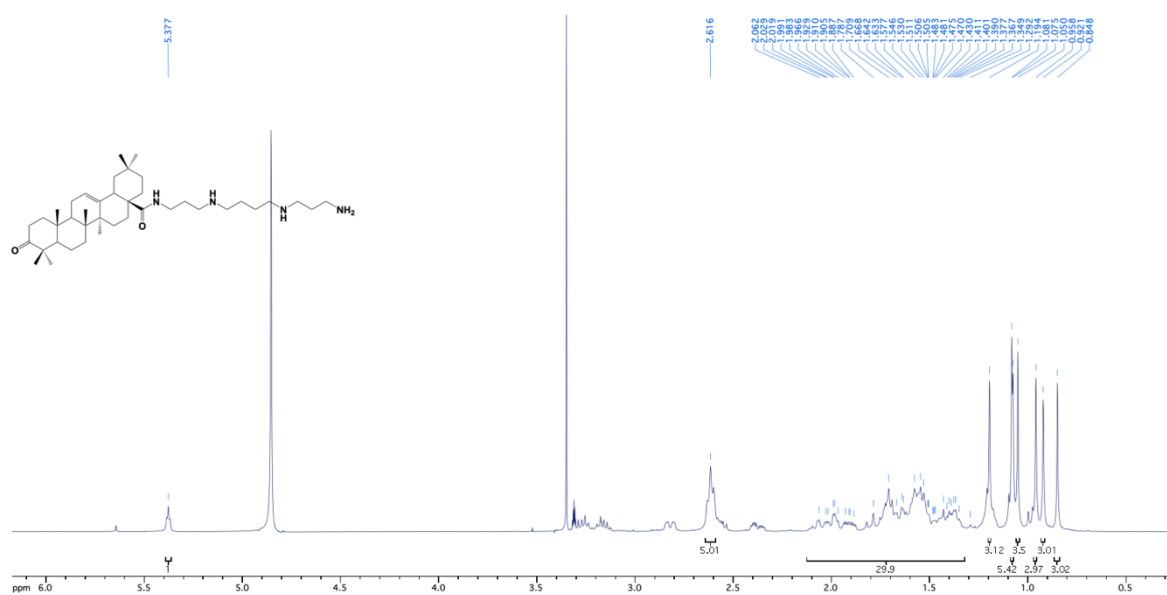

Figure S21.  $^1\text{H}$  NMR spectrum of compound **21**

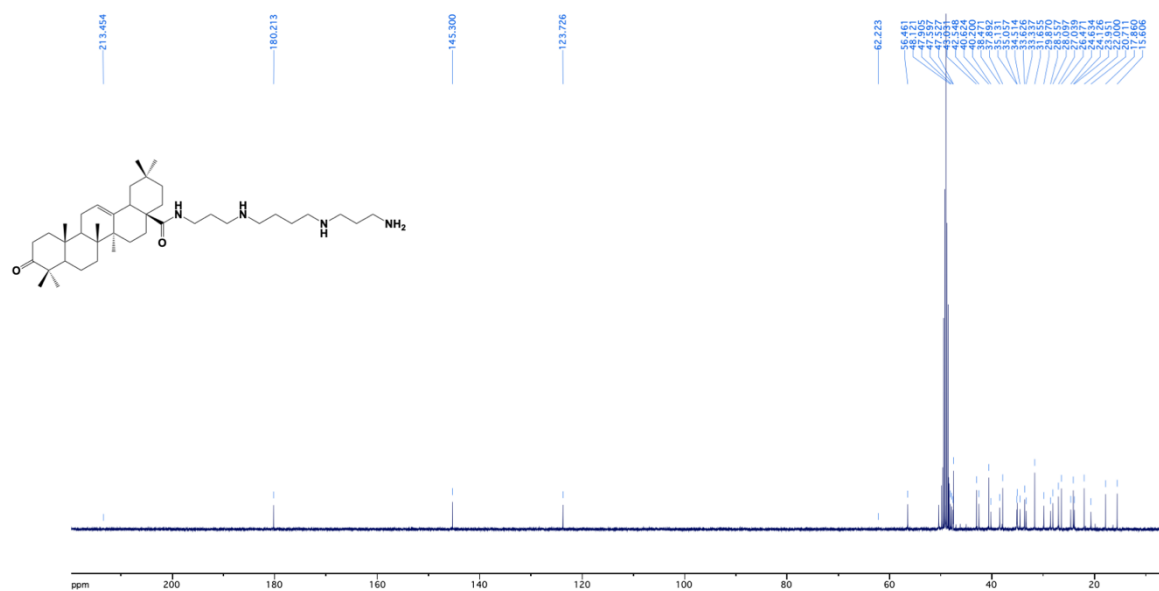

Figure S22.  $^{13}\text{C}$  NMR spectrum of compound **21**

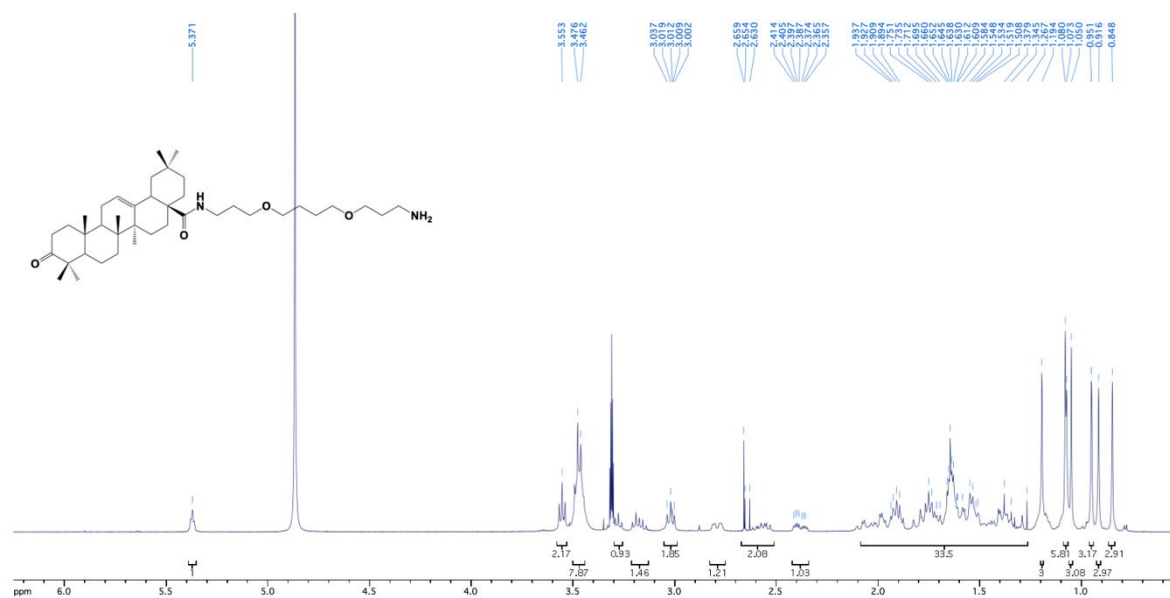

Figure S23.  $^1\text{H}$  NMR spectrum of compound **2m**

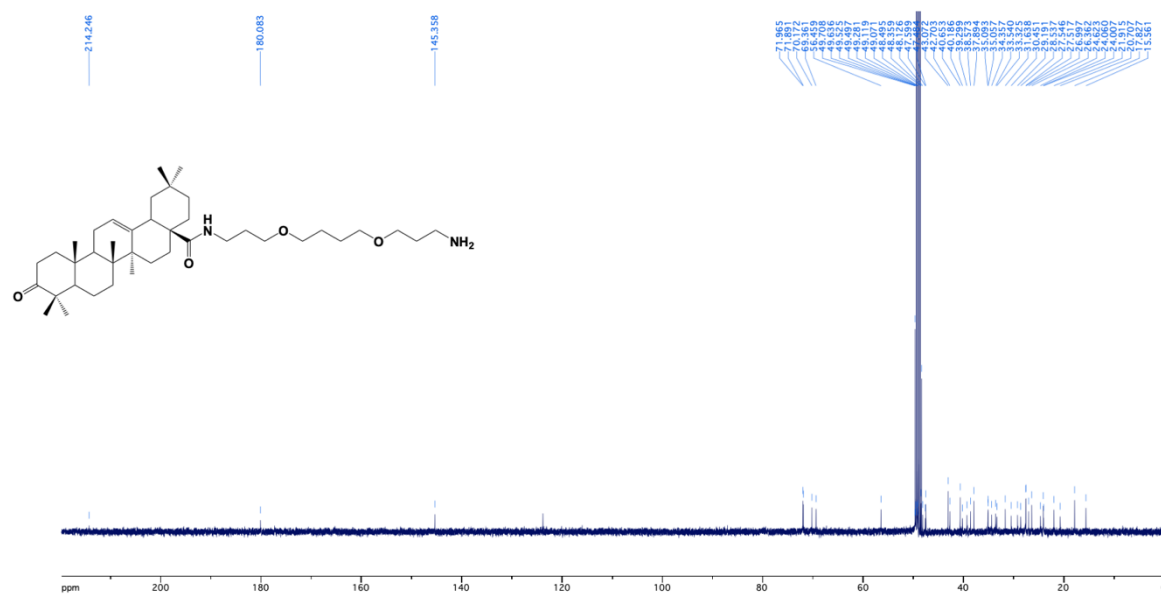

Figure S24.  $^{13}\text{C}$  NMR spectrum of compound **2m**

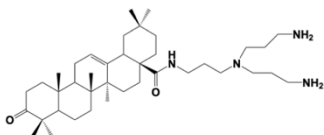

Figure S25.  $^1\text{H}$  NMR spectrum of compound **2n**

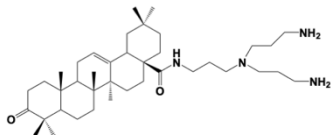

Figure S26.  $^{13}\text{C}$  NMR spectrum of compound **2n**

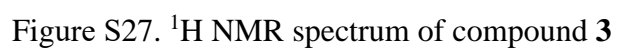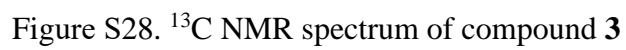



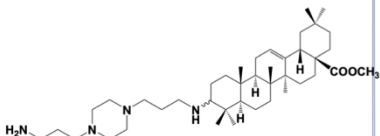

Figure S29.  $^1\text{H}$  NMR spectrum of compound **4**

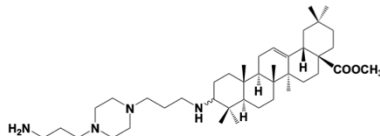

Figure S30.  $^{13}\text{C}$  NMR spectrum of compound **4**

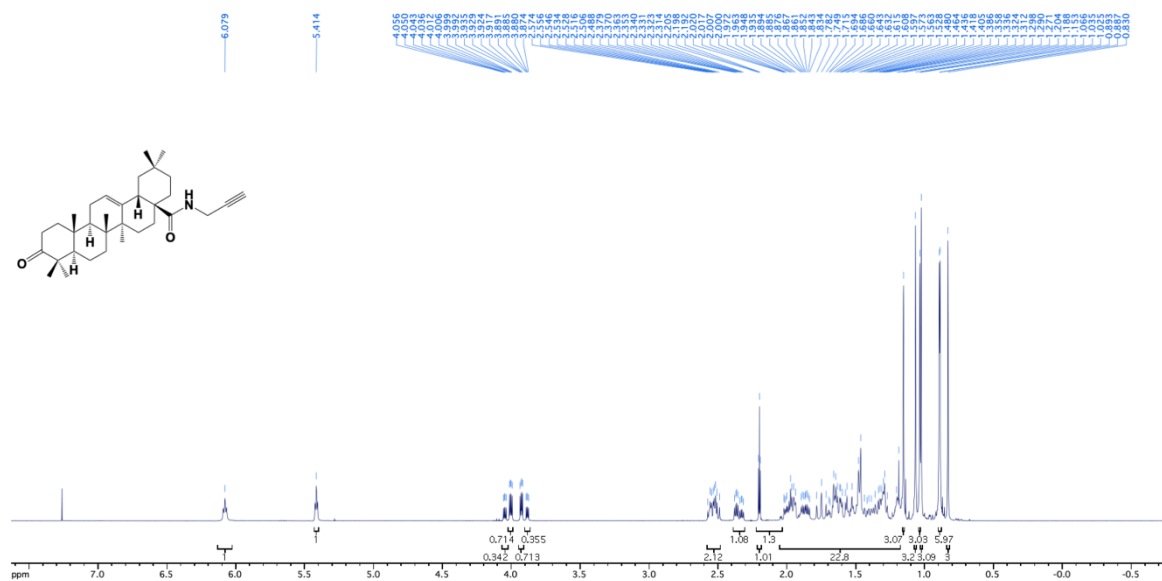

Figure S31.  $^1\text{H}$  NMR spectrum of compound **5**

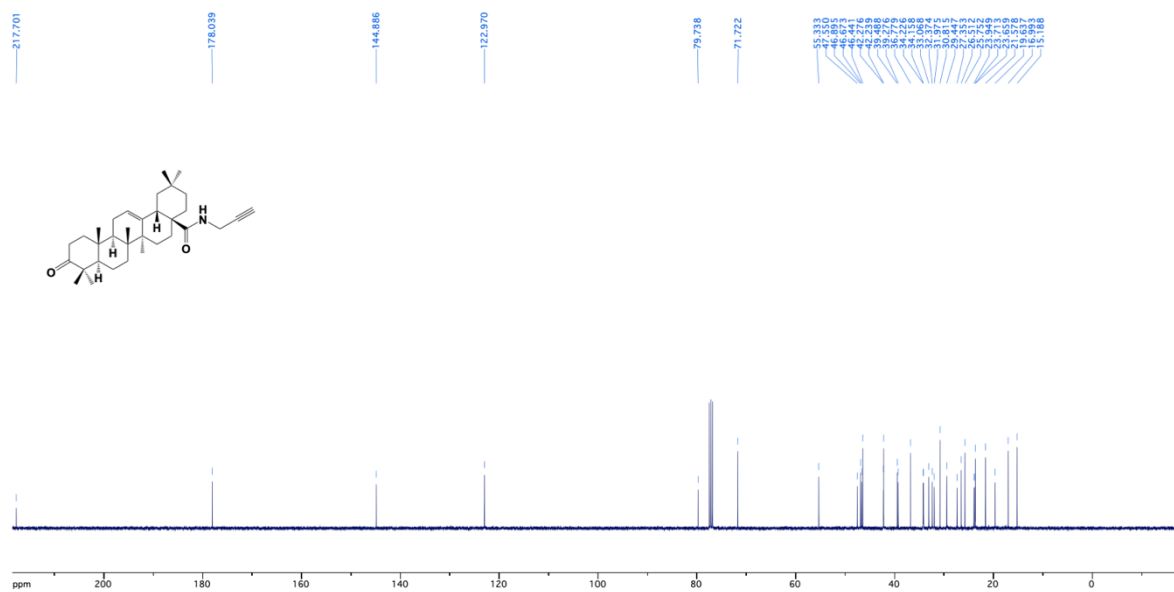

Figure S32.  $^{13}\text{C}$  NMR spectrum of compound **5**

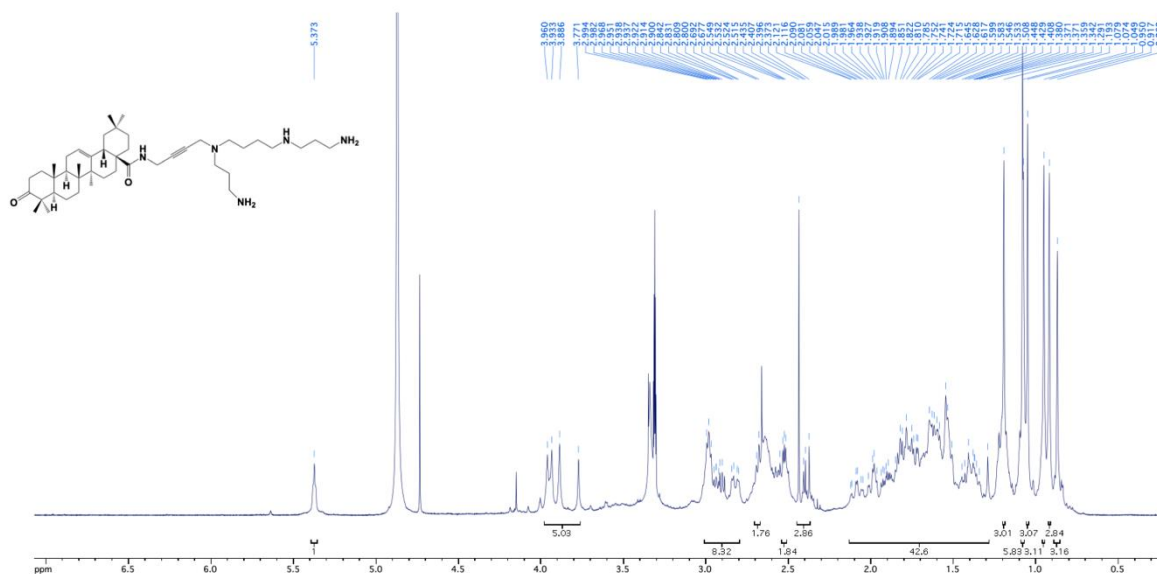

Figure S33. <sup>1</sup>H NMR spectrum of compound 6

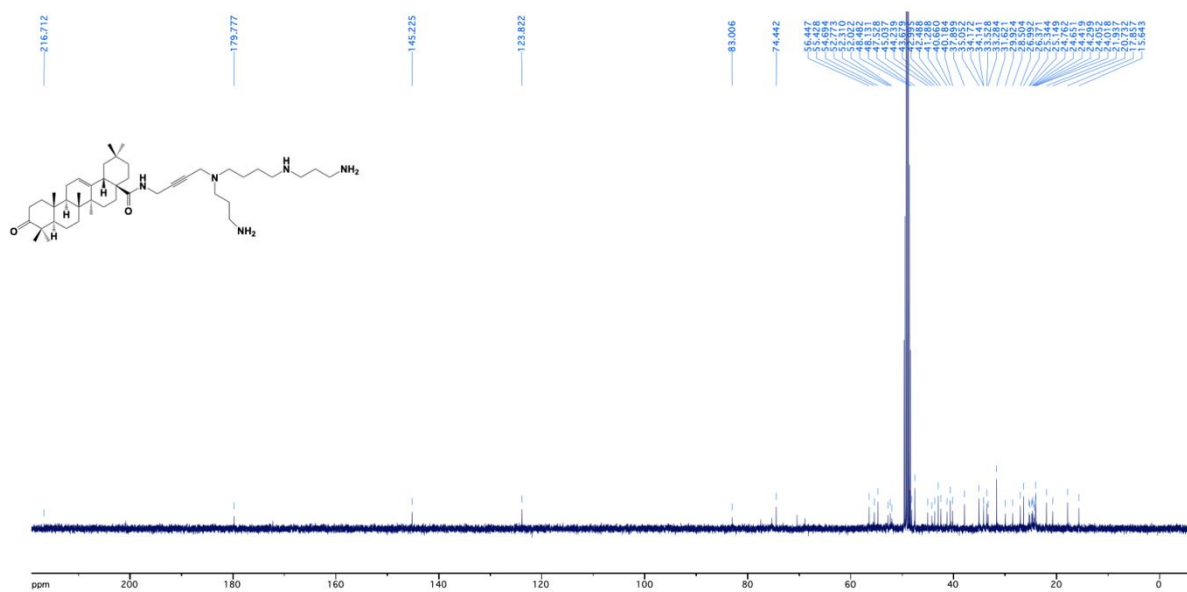

Figure S34. <sup>13</sup>C NMR spectrum of compound 6



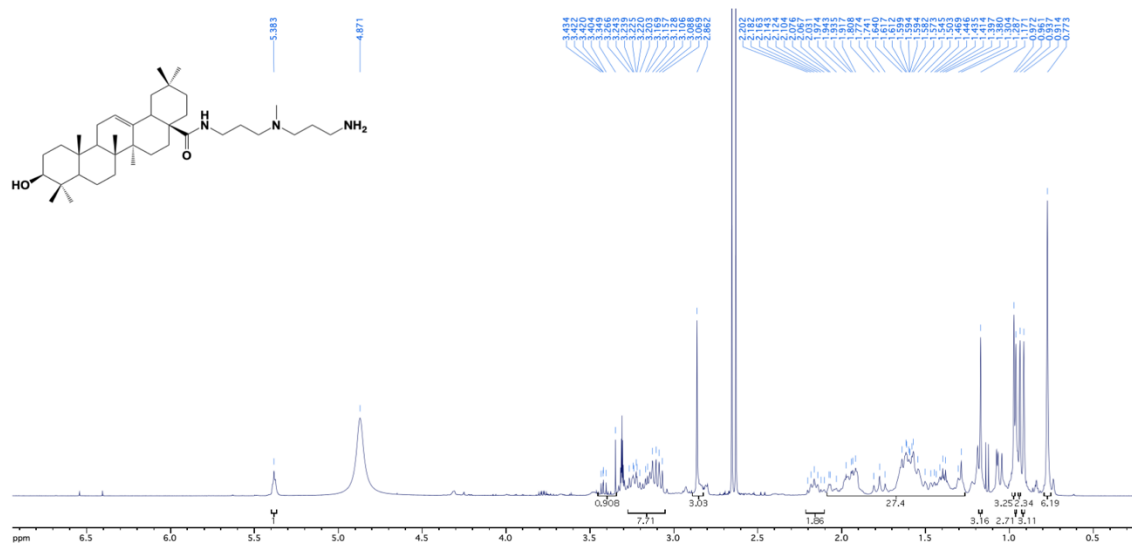

Figure S37.  $^1\text{H}$  NMR spectrum of compound **7b**

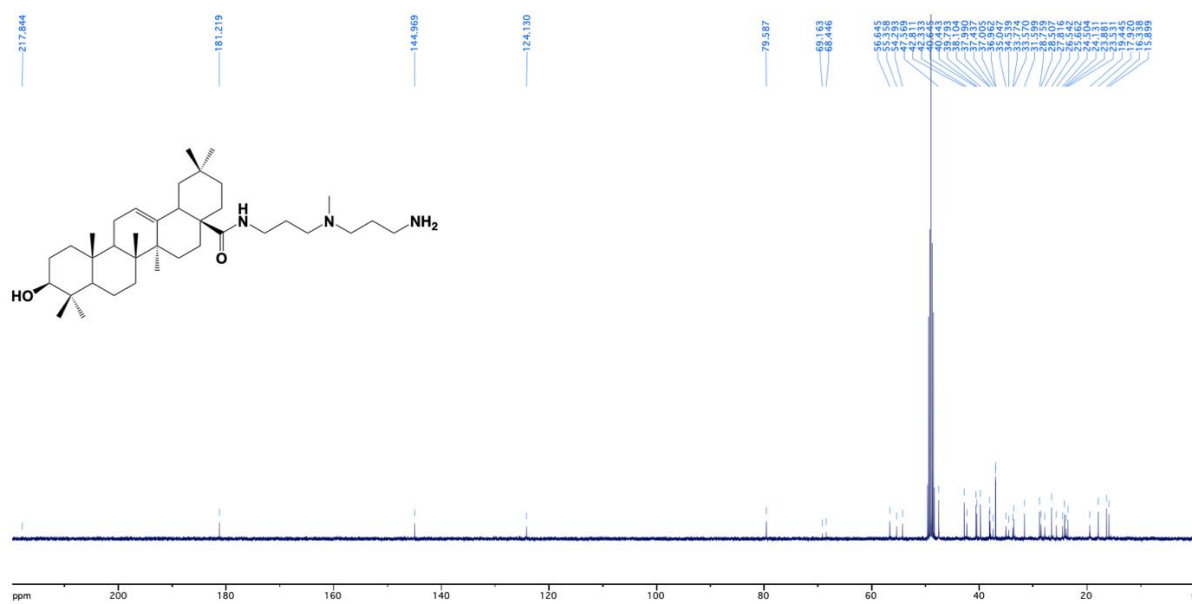

Figure S38.  $^{13}\text{C}$  NMR spectrum of compound **7b**

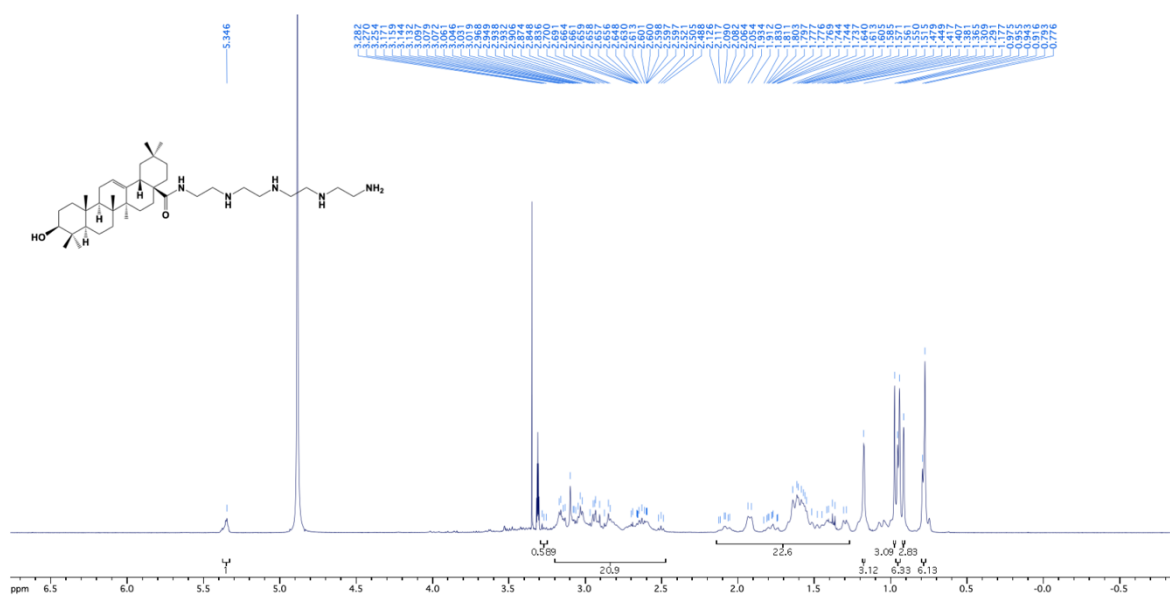

Figure S37.  $^1\text{H}$  NMR spectrum of compound **7c**

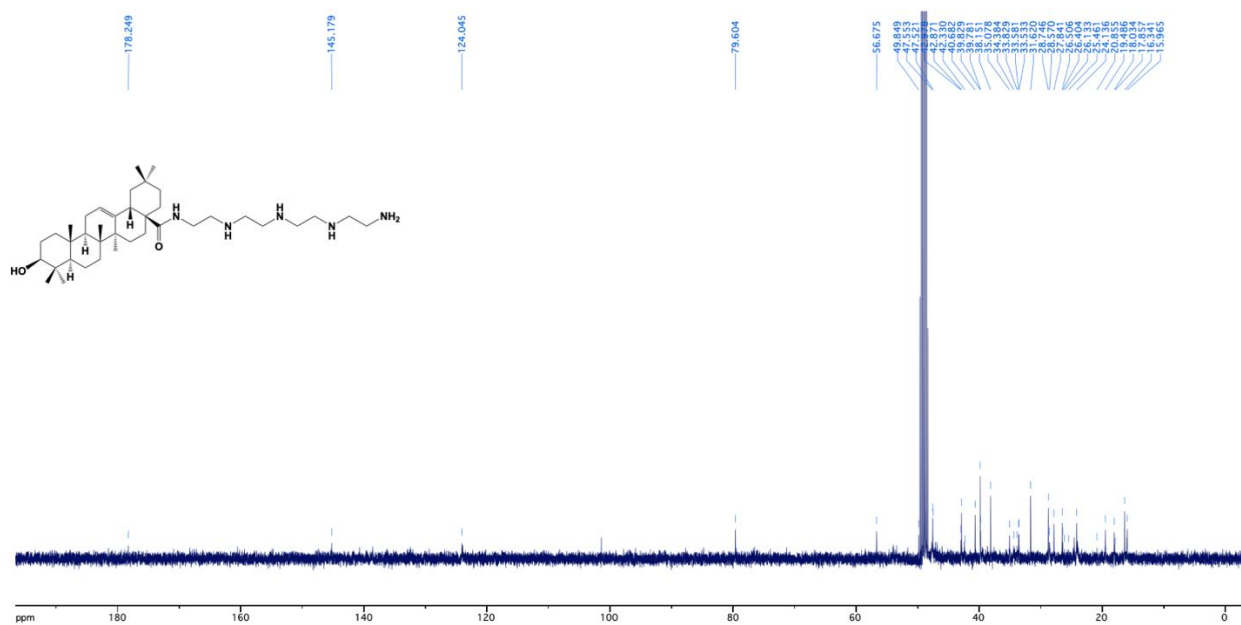

Figure S40.  $^{13}\text{C}$  NMR spectrum of compound **7c**
